# Supplementary material for: Proteins that bind regulatory regions identified by histone modification chromatin immunoprecipitations and mass spectrometry
Source: PubMed Central journal article supplement (PMC4455091; doi:10.1038/ncomms8155), 2015-05-20
Supplement: ncomms8155-s1.pdf [file ncomms8155-s1.pdf]

## Supplementary information

### Proteins that bind regulatory regions identified by histone-modification chromatin immunoprecipitations and mass spectrometry

Erik Engelen<sup>1\*</sup>, Johannes H. Brandsma<sup>1\*</sup>, Maaïke J. Moen<sup>1</sup>, Luca Signorile<sup>1</sup>, Dick H.W. Dekkers<sup>2</sup>, Jeroen Demmers<sup>2</sup>, Christel E.M. Kockx<sup>3</sup>, Zehila Ozgür<sup>3</sup>, Wilfred F. J. van IJcken<sup>3</sup>, Debbie L.C. van den Berg<sup>1,4</sup>, Raymond A. Poot<sup>1</sup>

<sup>1</sup> Department of Cell Biology, Erasmus MC, Wytemaweg 80, 3015 CN Rotterdam, The Netherlands

<sup>2</sup> Center for Proteomics, Erasmus MC, The Netherlands

<sup>3</sup> Center for Biomics, Erasmus MC, The Netherlands

<sup>4</sup> The Francis Crick Institute, Mill Hill Laboratory, The Ridgeway, London NW7 1AA, United Kingdom

\* These authors contributed equally to this work

Correspondence to:

Raymond A. Poot

[r.poot@erasmusmc.nl](mailto:r.poot@erasmusmc.nl)

Phone: +31-10-7043352

Fax: +31-10-7044743

Debbie L.C. van den Berg

[debbie.vandenberg@crick.ac.uk](mailto:debbie.vandenberg@crick.ac.uk)

Phone: +44-20-88162574

Fax: + 44-20-89064477

## **Table of contents**

### **Supplementary Figures**

Supplementary Figure 1: Modified ChIP-seq tracks around pluripotency gene Nanog

Supplementary Figure 2: Positions of Oct4 binding sites on Oct4 target genes

Supplementary Figure 3: Western Blots (full scans) for ChIP-MS samples (as in Figure 1d)

### **Supplementary Tables**

Supplementary Table 1: ChIP-MS identified proteins, predictions and phenotypes

Supplementary Table 2: ChIP-MS identified proteins

Supplementary Table 3: ChIP-MS identified complex subunits and predictions

Supplementary Table 6: Dppa2 target genes

Supplementary Table 7: Accession numbers of studies used for genome-wide correlations

References for pluripotency phenotypes of ChIP-MS identified factors (Supplementary Table 1)

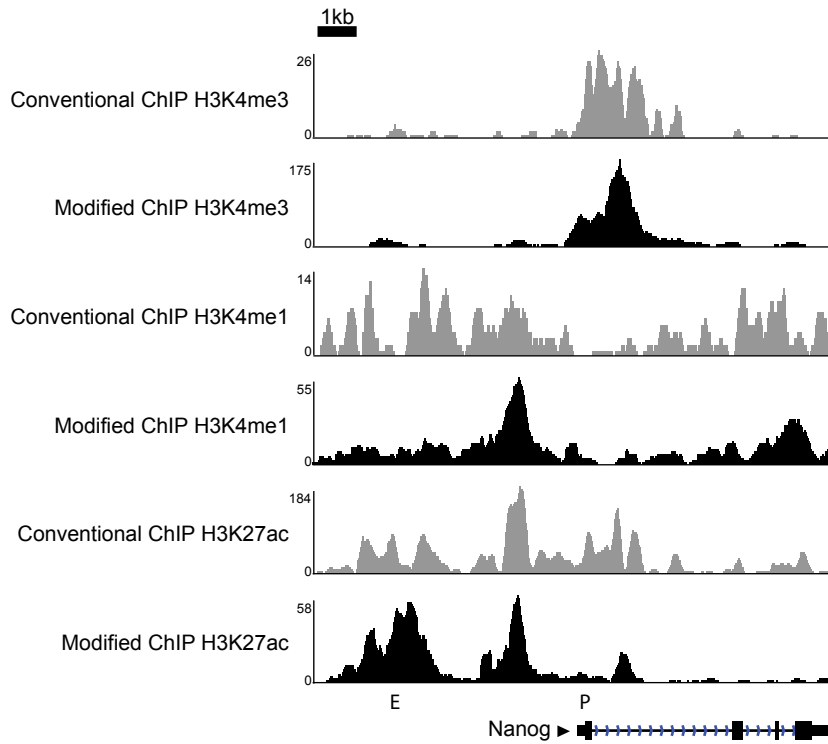

**Supplementary Figure 1. Modified ChIP-seq tracks around pluripotency gene *Nanog*.**

ChIP-seq tracks for modified ChIP or conventional ChIP for H3K4me3, H3K4me1 or H3K27ac around pluripotency gene *Nanog*. Sequence reads were plotted relative to chromosomal position. Genome location of *Nanog* is shown, scale bar indicates 1 kb of genome. P indicates promoter, E indicates putative enhancer.

**a**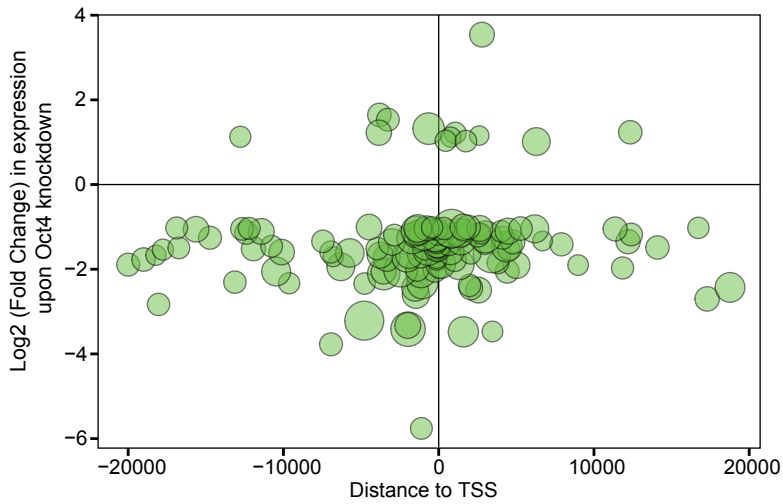**b**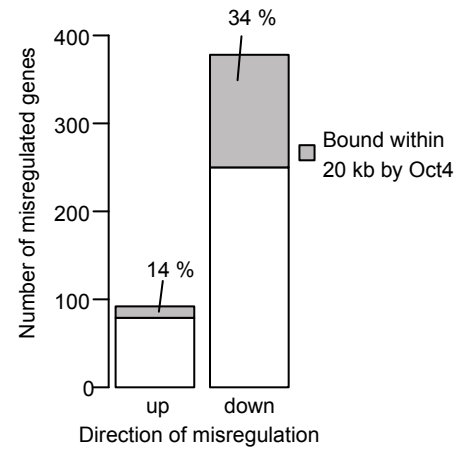

### Supplementary Figure 2. Position of Oct4 binding sites on Oct4 target genes.

(a) Bubble plot indicating the positions of Oct4 binding sites relative to the transcription start site (TSS) on genes that are either up-regulated  $\geq 2$  fold (upper part) or down-regulated  $\geq 2$  fold (lower part) after 24 h of Oct4 depletion in mouse ESCs. Log<sub>2</sub> of the fold change in expression is indicated on the Y-axis, Oct4 binding distance from the TSS (in base pairs) is indicated on the X-axis. Size of the bubbles correlates with fold difference of Oct4 ChIP peak over control.

(b) Bar diagram showing the total number of up-regulated and down-regulated genes upon Oct4 depletion and the number of these genes bound by Oct4 within 20 kb from the TSS (grey areas). The number of Oct4-bound genes is also indicated as a percentage of the total number of up-regulated or down-regulated genes.

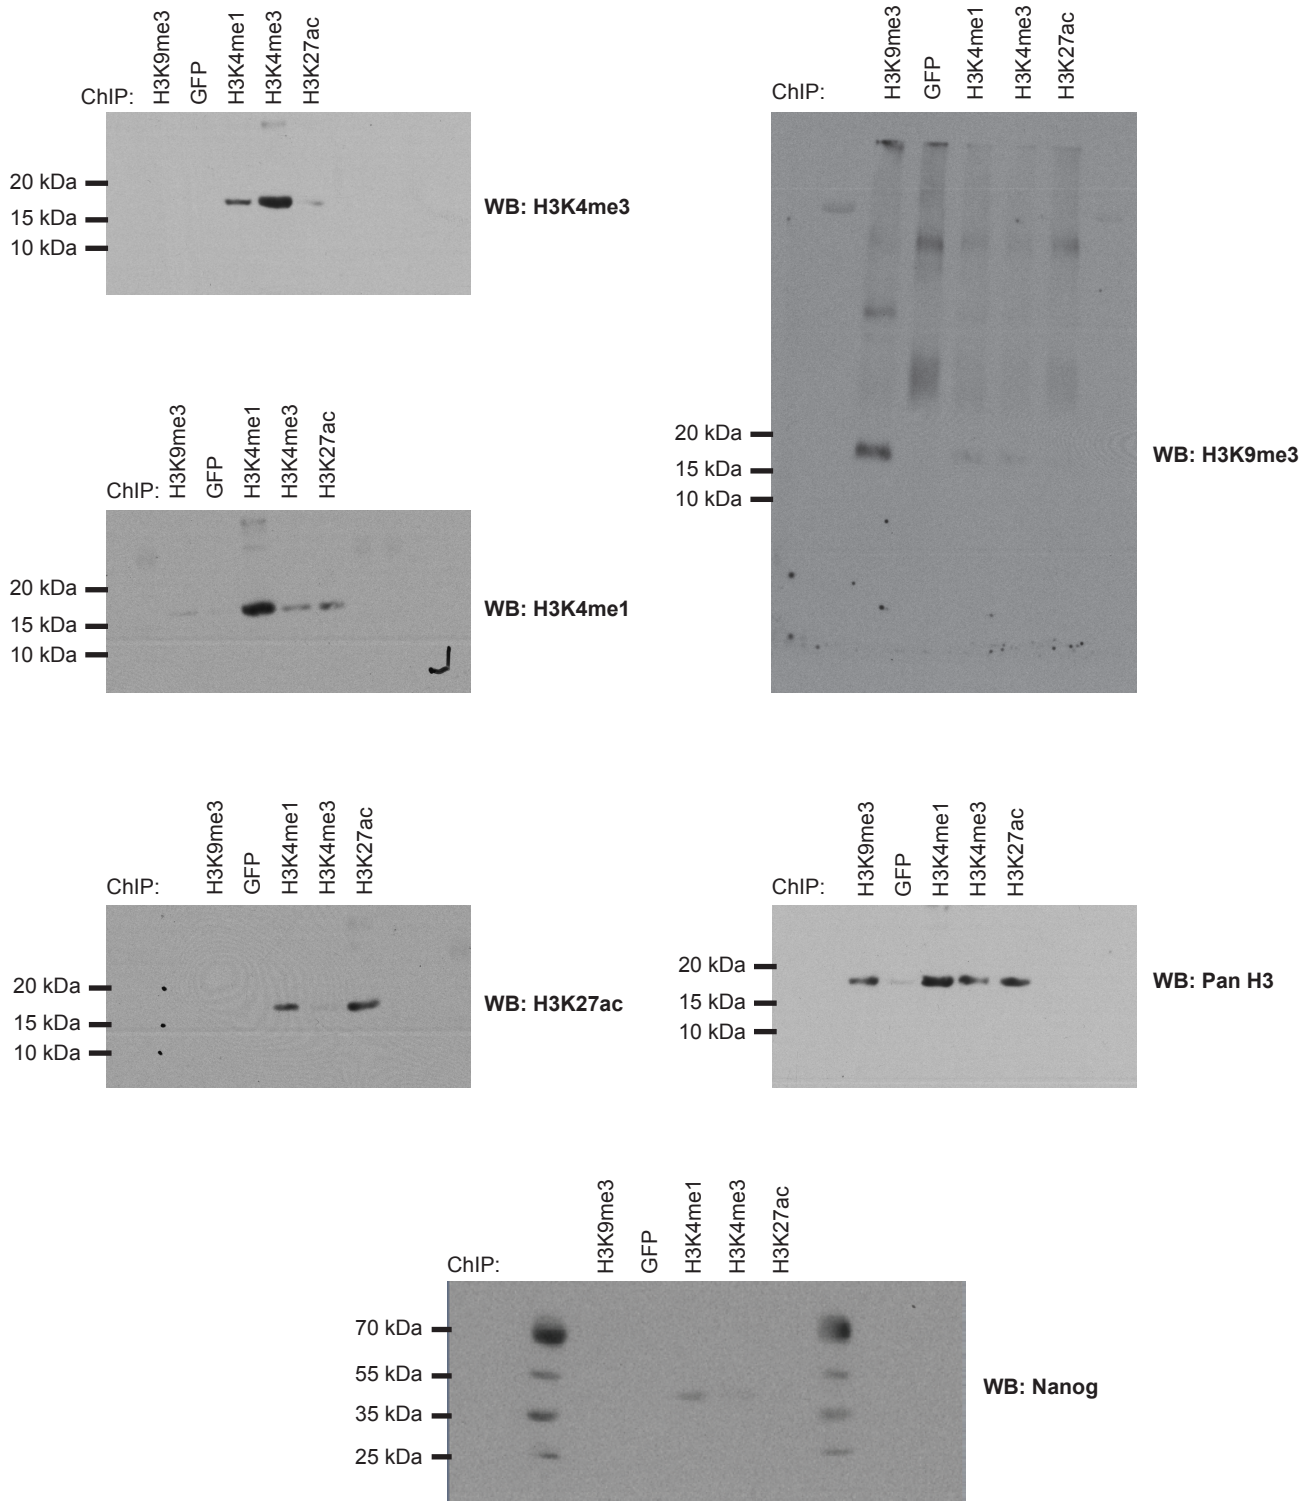

**Supplementary Figure 3. Western Blots (full scans) for ChIP-MS samples (as in Figure 1d).**

Western blots for histone modifications and Nanog for ChIP-MS samples. ChIP-MS samples (top), molecular weight markers (left) and antibody used for Western blot (right) are indicated.

Supplementary Table 1. ChIP-MS identified proteins, predictions and phenotypes

| Protein | Complex <sup>a</sup>         | H3K4me3<br>avrg<br>emPAI | H3K27ac<br>avrg<br>emPAI | H3K4me1<br>avrg<br>emPAI | H3K9me3<br>avrg<br>emPAI | GFP<br>avrg<br>emPAI | H3K27ac<br>ratio | Prediction <sup>b</sup> | Pluripotency<br>phenotype <sup>c</sup> |
|---------|------------------------------|--------------------------|--------------------------|--------------------------|--------------------------|----------------------|------------------|-------------------------|----------------------------------------|
| Actl6a  | BAF + INO80 +<br>Trrap/Ep400 | 0,29                     | 0,16                     | 0,12                     | 0,08                     |                      | 0,55             | Promoter                | -                                      |
| Actr3   | Arp2/3                       | 0,04                     |                          |                          |                          |                      | 0                | Promoter                | -                                      |
| Actr5   |                              |                          | 0,03                     |                          |                          |                      |                  | Unclear                 | -                                      |
| Adnp    |                              |                          |                          | 0,03                     | 0,02                     |                      | 0                | Enhancer                | -                                      |
| Ankhd1  |                              |                          |                          | 0,10                     |                          |                      | 0                | Enhancer                | -                                      |
| Anln    |                              |                          |                          |                          | 0,03                     |                      |                  | Heterochromatin         | -                                      |
| Anp32a  | SET                          | 0,17                     |                          | 0,18                     |                          |                      | 0                | Enhancer                | -                                      |
| Arid1a  | BAF                          |                          | 0,07                     | 0,06                     |                          |                      | 1,17             | Enhancer                | yes                                    |
| Arid4a  | Sin3                         | 0,12                     |                          |                          |                          |                      | 0                | Promoter                | -                                      |
| Ash2l   | MLL                          | 0,25                     |                          |                          |                          |                      | 0                | Promoter                | yes                                    |
| Atad2b  |                              |                          | 0,03                     | 0,04                     | 0,04                     |                      | 0,75             | Enhancer                | -                                      |
| Atrx    |                              |                          |                          |                          | 0,09                     |                      |                  | Heterochromatin         | -                                      |
| Aurkb   | Aurora K                     | 0,22                     | 0,10                     | 0,10                     | 0,65                     |                      |                  | Heterochromatin         | yes                                    |
| Banf1   |                              | 0,66                     | 0,47                     | 0,63                     |                          |                      | 0,71             | Promoter                | yes                                    |
| Bap18   | MLL                          | 0,63                     |                          |                          |                          |                      | 0                | Promoter                | -                                      |
| Baz1a   | ACF                          |                          |                          | 0,01                     |                          |                      | 0                | Enhancer                | -                                      |
| Baz2a   | NoRC                         | 0,06                     | 0,22                     | 0,20                     | 0,07                     |                      | 1,10             | Enhancer                | -                                      |
| Bend3   |                              | 0,24                     |                          | 0,04                     |                          |                      | 0                | Promoter                | -                                      |
| Bptf    | NURF                         | 0,08                     | 0,02                     | 0,02                     |                          |                      | 0,25             | Promoter                | yes                                    |
| Brd1    | MOZ/MORF                     | 0,03                     | 0,05                     | 0,10                     |                          |                      | 0,50             | Enhancer                | -                                      |
| Brd2    |                              | 0,37                     | 0,75                     | 0,18                     |                          |                      | 2,03             | Promoter                | -                                      |
| Brd3    |                              | 0,12                     | 0,32                     |                          |                          |                      | 2,67             | Promoter                | -                                      |
| Brd4    |                              | 0,03                     | 0,21                     | 0,10                     |                          |                      | 2,10             | Enhancer                | -                                      |
| Brms1   | Sin3                         | 0,14                     |                          |                          |                          |                      | 0                | Promoter                | -                                      |
| Brms1l  | Sin3                         | 0,47                     |                          |                          |                          |                      | 0                | Promoter                | -                                      |
| Brpf1   | MOZ/MORF                     | 0,16                     |                          |                          |                          |                      | 0                | Promoter                | -                                      |
| Brpf3   | MOZ/MORF                     | 0,03                     |                          |                          |                          |                      | 0                | Promoter                | -                                      |
| Cad     |                              |                          |                          | 0,04                     |                          |                      | 0                | Enhancer                | -                                      |
| Cald1   |                              | 0,06                     |                          |                          |                          |                      | 0                | Promoter                | -                                      |
| Cbx7    | PRC1                         | 0,10                     |                          | 0,10                     |                          |                      | 0                | Promoter                | yes                                    |
| Cdc5l   | Prp19                        |                          |                          | 0,04                     |                          |                      | 0                | Enhancer                | -                                      |
| Cdc73   | PAF1                         | 0,10                     | 0,10                     |                          |                          |                      | 1,00             | Promoter                | yes                                    |
| Cdca7   |                              |                          | 0,09                     | 0,09                     |                          |                      | 1,00             | Enhancer                | -                                      |
| Cdca8   | Aurora K                     | 0,28                     | 0,13                     | 0,24                     | 1,17                     |                      |                  | Heterochromatin         | -                                      |
| Cdk7    | TFIIH                        | 0,05                     |                          |                          |                          |                      | 0                | Promoter                | -                                      |
| Cdk9    | P-TEFb                       |                          | 0,09                     |                          |                          |                      |                  | Unclear                 | yes                                    |
| Cep95   |                              |                          | 0,02                     | 0,04                     |                          |                      | 0,50             | Enhancer                | -                                      |
| Chaf1b  | CAF1                         |                          | 0,23                     | 0,52                     |                          |                      | 0,44             | Enhancer                | yes                                    |
| Chd1    |                              | 0,26                     | 0,24                     | 0,14                     | 0,02                     |                      | 0,92             | Promoter                | yes                                    |
| Chd2    |                              | 0,05                     |                          | 0,03                     |                          |                      | 0                | Promoter                | -                                      |
| Chd8    |                              | 0,15                     | 0,03                     |                          |                          |                      | 0,20             | Promoter                | -                                      |
| Ckb     |                              | 0,14                     |                          |                          |                          |                      | 0                | Promoter                | -                                      |
| Coil    |                              |                          |                          |                          | 0,03                     |                      |                  | Heterochromatin         | -                                      |
| Cpsf6   | CFIm                         | 0,07                     | 0,07                     |                          |                          |                      | 1,00             | Promoter                | -                                      |
| Creb1   |                              | 0,11                     |                          |                          |                          |                      | 0                | Promoter                | -                                      |
| Cse1l   |                              | 0,04                     |                          |                          |                          |                      | 0                | Promoter                | -                                      |
| Csnk2a1 |                              | 0,89                     | 0,27                     | 0,21                     |                          |                      | 0,30             | Promoter                | -                                      |
| Csnk2b  |                              | 0,82                     | 0,26                     | 0,08                     |                          |                      | 0,32             | Promoter                | -                                      |
| Csrp2bp | ATAC                         | 0,04                     |                          |                          |                          |                      | 0                | Promoter                | -                                      |

| Protein | Complex <sup>a</sup>          | H3K4me3<br>avrg<br>emPAI | H3K27ac<br>avrg<br>emPAI | H3K4me1<br>avrg<br>emPAI | H3K9me3<br>avrg<br>emPAI | GFP<br>avrg<br>emPAI | H3K27ac<br>ratio | Prediction <sup>b</sup> | Pluripotency<br>phenotype <sup>c</sup> |
|---------|-------------------------------|--------------------------|--------------------------|--------------------------|--------------------------|----------------------|------------------|-------------------------|----------------------------------------|
| Ctbp2   |                               | 0,46                     | 0,30                     | 0,43                     | 0,04                     |                      | 0,65             | Promoter                | yes                                    |
| Ctcf    |                               | 0,07                     |                          | 0,05                     |                          |                      | 0                | Promoter                | -                                      |
| Ctr9    | PAF1                          | 0,03                     | 0,03                     |                          |                          |                      | 1,00             | Promoter                | yes                                    |
| Cul4b   | DDB1/Cul4 ubiquitin<br>ligase | 0,17                     | 0,18                     | 0,18                     |                          |                      | 1,00             | Enhancer                | -                                      |
| Ddb1    | DDB1/Cul4 ubiquitin<br>ligase | 0,19                     | 0,24                     | 0,29                     |                          |                      | 0,83             | Enhancer                | -                                      |
| Ddx47   |                               |                          |                          |                          | 0,15                     |                      |                  | Heterochromatin         | -                                      |
| Ddx54   |                               |                          |                          | 0,04                     |                          |                      | 0                | Enhancer                | -                                      |
| Dido1   |                               | 0,02                     |                          |                          |                          |                      | 0                | Promoter                | -                                      |
| Dis3    |                               |                          | 0,05                     | 0,05                     |                          |                      | 1,00             | Enhancer                | -                                      |
| Dmap1   | Trrap/Ep400                   | 0,07                     |                          | 0,04                     |                          |                      | 0                | Promoter                | yes                                    |
| Dnajc9  |                               | 0,07                     | 0,14                     | 0,14                     |                          |                      | 1,00             | Enhancer                | -                                      |
| Dpf2    | BAF                           |                          | 0,22                     | 0,12                     |                          |                      | 1,83             | Enhancer                | -                                      |
| Dppa2   |                               | 0,61                     | 0,06                     | 0,29                     |                          |                      | 0,10             | Promoter                | yes                                    |
| Dppa4   |                               | 0,58                     |                          | 0,39                     |                          |                      | 0                | Promoter                | yes                                    |
| Dpy30   | MLL                           | 0,18                     |                          |                          |                          |                      | 0                | Promoter                | yes                                    |
| Dut     |                               | 0,41                     | 0,18                     | 0,18                     |                          |                      | 0,44             | Promoter                | -                                      |
| Emsy    |                               | 0,02                     |                          |                          |                          |                      | 0                | Promoter                | -                                      |
| Ep300   |                               |                          | 0,05                     |                          |                          |                      |                  | Unclear                 | yes                                    |
| Ep400   | Trrap/Ep400                   |                          | 0,02                     |                          |                          |                      |                  | Unclear                 | yes                                    |
| Erh     |                               | 0,37                     |                          |                          |                          |                      | 0                | Promoter                | -                                      |
| Esrrb   |                               |                          | 0,08                     | 0,20                     |                          |                      | 0,40             | Enhancer                | yes                                    |
| Ezh2    | PRC2                          | 0,07                     | 0,04                     | 0,09                     |                          |                      | 0,44             | Enhancer                | yes                                    |
| Fam60a  | Sin3                          | 0,24                     |                          |                          |                          |                      | 0                | Promoter                | -                                      |
| Fbx19   | SCF ubiquitin ligase          | 0,05                     |                          |                          |                          |                      | 0                | Promoter                | -                                      |
| Fkbp4   |                               |                          |                          | 0,07                     |                          |                      | 0                | Enhancer                | -                                      |
| Gltscr2 |                               |                          |                          | 0,07                     |                          |                      | 0                | Enhancer                | -                                      |
| Glyr1   |                               | 0,19                     | 0,24                     | 0,26                     | 0,07                     |                      | 0,92             | Enhancer                | -                                      |
| Gm53    |                               | 0,19                     |                          |                          |                          |                      | 0                | Promoter                | -                                      |
| Gtf2e1  | TFIIE                         |                          |                          | 0,08                     |                          |                      | 0                | Enhancer                | -                                      |
| Gtf2i   |                               |                          | 0,04                     | 0,07                     |                          |                      | 0,57             | Enhancer                | -                                      |
| Gtf3c1  | TFIIIC                        | 0,01                     | 0,01                     | 0,02                     |                          |                      | 0,50             | Enhancer                | -                                      |
| Hat1    |                               | 0,11                     | 0,04                     | 0,04                     |                          |                      | 0,36             | Promoter                | -                                      |
| Hcfc1   | MLL                           | 0,05                     |                          |                          |                          |                      | 0                | Promoter                | yes                                    |
| Hdac1   | NuRD + Sin3 + REST            | 1,02                     | 0,30                     | 0,38                     | 0,11                     |                      | 0,29             | Promoter                | yes                                    |
| Hdac2   | NuRD + Sin3 + REST            | 0,40                     |                          | 0,10                     |                          |                      | 0                | Promoter                | -                                      |
| Hdgfrp2 |                               |                          | 0,05                     |                          |                          |                      |                  | Unclear                 | -                                      |
| Hmga2   |                               | 0,14                     | 0,14                     |                          | 0,28                     |                      |                  | Heterochromatin         | -                                      |
| Hmgb3   |                               | 0,11                     |                          | 0,1                      |                          |                      | 0                | Promoter                | -                                      |
| Hmgxb4  |                               | 0,20                     |                          |                          |                          |                      | 0                | Promoter                | -                                      |
| Hp1bp3  |                               | 0,26                     |                          | 0,38                     | 0,23                     |                      | 0                | Enhancer                | -                                      |
| Incenp  | Aurora K                      | 0,06                     |                          |                          | 0,26                     |                      |                  | Heterochromatin         | -                                      |
| Ing1    | Sin3                          | 0,06                     |                          |                          |                          |                      | 0                | Promoter                | -                                      |
| Ing2    | Sin3                          | 0,11                     |                          |                          |                          |                      | 0                | Promoter                | -                                      |
| Ing3    | Trrap/Ep400                   | 0,04                     | 0,04                     |                          |                          |                      | 1,00             | Promoter                | -                                      |
| Ing4    | Trrap/Ep400                   | 0,14                     |                          | 0,07                     |                          |                      | 0                | Promoter                | -                                      |
| Ing5    | MOZ/MORF                      | 0,58                     | 0,13                     | 0,20                     |                          |                      | 0,22             | Promoter                | yes                                    |
| Ino80   | INO80                         | 0,05                     | 0,05                     |                          |                          |                      | 1,00             | Promoter                | yes                                    |
| Ints1   | Integrator                    |                          |                          | 0,02                     |                          |                      | 0                | Enhancer                | -                                      |
| Irgc    |                               |                          |                          | 0,04                     |                          |                      | 0                | Enhancer                | -                                      |
| Jarid2  | PRC2                          | 0,16                     | 0,05                     | 0,21                     | 0,04                     |                      | 0,24             | Enhancer                | yes                                    |
| Kdm1a   | BHC                           | 0,06                     | 0,02                     | 0,02                     | 0,02                     |                      | 0,33             | Promoter                | yes                                    |
| Kdm2a   | SCF ubiquitin ligase          | 0,16                     | 0,03                     | 0,03                     |                          |                      | 0,19             | Promoter                | -                                      |

| Protein | Complex <sup>a</sup> | H3K4me3<br>avrg<br>emPAI | H3K27ac<br>avrg<br>emPAI | H3K4me1<br>avrg<br>emPAI | H3K9me3<br>avrg<br>emPAI | GFP<br>avrg<br>emPAI | H3K27ac<br>ratio | Prediction <sup>b</sup> | Pluripotency<br>phenotype <sup>c</sup> |
|---------|----------------------|--------------------------|--------------------------|--------------------------|--------------------------|----------------------|------------------|-------------------------|----------------------------------------|
| Kdm2b   | PRC1                 | 0,09                     |                          | 0,01                     |                          |                      | 0                | Promoter                | yes                                    |
| Kdm4a   |                      | 0,03                     |                          |                          |                          |                      | 0                | Promoter                | -                                      |
| Kdm4c   |                      | 0,65                     | 0,03                     | 0,13                     |                          |                      | 0,05             | Promoter                | yes                                    |
| Kdm5a   |                      | 0,02                     |                          |                          |                          |                      | 0                | Promoter                | -                                      |
| Kdm5b   |                      | 0,25                     | 0,02                     | 0,12                     |                          |                      | 0,08             | Promoter                | yes                                    |
| Kif2c   |                      |                          |                          | 0,05                     |                          |                      | 0                | Enhancer                | -                                      |
| Kif4    |                      |                          |                          | 0,03                     |                          |                      | 0                | Enhancer                | -                                      |
| Kifc5b  |                      |                          | 0,07                     | 0,15                     |                          |                      | 0,47             | Enhancer                | -                                      |
| Klf16   |                      | 0,16                     |                          |                          |                          |                      | 0                | Promoter                | -                                      |
| Klf5    |                      |                          | 0,07                     | 0,04                     |                          |                      | 1,75             | Enhancer                | yes                                    |
| L3mbtl2 |                      | 0,08                     |                          | 0,07                     |                          |                      | 0                | Promoter                | yes                                    |
| Las1l   | 5FMC                 |                          |                          | 0,06                     |                          |                      | 0                | Enhancer                | -                                      |
| Lasp1   |                      | 0,29                     |                          | 0,13                     |                          |                      | 0                | Promoter                | -                                      |
| Lig1    |                      | 0,08                     |                          | 0,02                     |                          |                      | 0                | Promoter                | -                                      |
| Lig3    |                      |                          | 0,02                     | 0,05                     |                          |                      | 0,40             | Enhancer                | -                                      |
| Llph    |                      |                          |                          | 0,13                     |                          |                      | 0                | Enhancer                | -                                      |
| Lmna    |                      | 0,13                     | 0,08                     | 0,08                     | 0,48                     |                      |                  | Heterochromatin         | -                                      |
| Lmnb1   |                      | 0,99                     | 1,60                     | 1,83                     | 3,15                     | 0,37                 |                  | Heterochromatin         | -                                      |
| Lmnb2   |                      | 0,12                     | 0,24                     | 0,30                     | 0,98                     |                      |                  | Heterochromatin         | -                                      |
| Lrwd1   | ORC                  | 0,14                     |                          | 0,11                     | 0,35                     |                      |                  | Heterochromatin         | -                                      |
| Lsm2    | U6 SnRNP             |                          | 0,18                     |                          |                          |                      |                  | Unclear                 | -                                      |
| Luc7l3  |                      |                          |                          | 0,04                     |                          |                      | 0                | Enhancer                | -                                      |
| Max     |                      | 0,11                     | 0,11                     | 0,10                     |                          |                      | 1,00             | Promoter                | yes                                    |
| Mbt1    |                      | 0,06                     |                          |                          |                          |                      | 0                | Promoter                | -                                      |
| Mdc1    |                      |                          | 0,03                     | 0,05                     |                          |                      | 0,60             | Enhancer                | -                                      |
| Meaf6   | Trrap/Ep400          | 0,51                     | 0,19                     | 0,19                     |                          |                      | 0,37             | Promoter                | -                                      |
| Men1    | MLL                  | 0,32                     | 0,03                     | 0,15                     |                          |                      | 0,09             | Promoter                | -                                      |
| Mll2    | MLL                  | 0,21                     |                          | 0,02                     |                          | 0,01                 | 0,00             | Promoter                | -                                      |
| Morc2a  |                      |                          | 0,05                     |                          |                          |                      |                  | Unclear                 | -                                      |
| Morc3   |                      | 0,70                     | 0,24                     | 0,24                     | 0,02                     |                      | 0,34             | Promoter                | -                                      |
| Mta3    | NuRD                 | 0,24                     | 0,14                     | 0,27                     |                          |                      | 0,52             | Enhancer                | -                                      |
| Mtf2    | PRC2                 | 0,16                     | 0,06                     | 0,22                     | 0,06                     |                      | 0,27             | Enhancer                | yes                                    |
| Mycn    |                      | 0,08                     | 0,08                     |                          |                          |                      | 1,00             | Promoter                | yes                                    |
| Myst2   | HBO1                 | 0,56                     | 0,36                     | 0,39                     | 0,06                     |                      | 0,64             | Promoter                | yes                                    |
| Myst3   | MOZ                  | 0,08                     |                          |                          |                          |                      | 0                | Promoter                | yes                                    |
| Myst4   | MORF                 | 0,04                     |                          |                          |                          |                      | 0                | Promoter                | -                                      |
| Nacc1   |                      | 0,04                     | 0,07                     | 0,13                     |                          |                      | 0,54             | Enhancer                | yes                                    |
| Nasp    |                      |                          | 0,02                     | 0,02                     |                          |                      | 1,00             | Enhancer                | -                                      |
| Nfkb    |                      |                          | 0,03                     |                          |                          |                      |                  | Unclear                 | yes                                    |
| Nolc1   |                      |                          |                          | 0,05                     |                          |                      | 0                | Enhancer                | -                                      |
| Nrf1    |                      | 0,08                     |                          |                          |                          |                      | 0                | Promoter                | -                                      |
| Nsd1    |                      | 0,01                     | 0,04                     | 0,05                     |                          |                      | 0,80             | Enhancer                | -                                      |
| Nudt13  |                      |                          |                          | 0,10                     |                          |                      | 0                | Enhancer                | -                                      |
| Nudt21  | CFIm                 | 0,48                     |                          |                          |                          |                      | 0                | Promoter                | -                                      |
| Numa1   |                      | 0,22                     | 0,15                     | 0,29                     | 0,10                     |                      | 0,52             | Enhancer                | -                                      |
| Oct4    |                      | 0,16                     | 0,10                     | 0,21                     | 0,05                     |                      | 0,48             | Enhancer                | yes                                    |
| Ogt     |                      | 0,15                     | 0,02                     | 0,05                     |                          |                      | 0,13             | Promoter                | yes                                    |
| Pak1ip1 |                      | 0,19                     |                          |                          |                          |                      | 0                | Promoter                | -                                      |
| Parp2   |                      |                          |                          | 0,03                     |                          |                      | 0                | Enhancer                | -                                      |
| Parp9   |                      |                          |                          |                          | 0,04                     |                      |                  | Heterochromatin         | -                                      |
| Patz1   |                      | 0,05                     |                          | 0,05                     |                          |                      | 0                | Promoter                | -                                      |
| Pbrm1   | BAF                  | 0,02                     | 0,11                     | 0,11                     |                          |                      | 1,00             | Enhancer                | -                                      |
| Pds5a   | Wapl                 |                          | 0,03                     | 0,05                     |                          |                      | 0,60             | Enhancer                | -                                      |



| Protein | Complex <sup>a</sup> | H3K4me3<br>avrg<br>emPAI | H3K27ac<br>avrg<br>emPAI | H3K4me1<br>avrg<br>emPAI | H3K9me3<br>avrg<br>emPAI | GFP<br>avrg<br>emPAI | H3K27ac<br>ratio | Prediction <sup>b</sup> | Pluripotency<br>phenotype <sup>c</sup> |
|---------|----------------------|--------------------------|--------------------------|--------------------------|--------------------------|----------------------|------------------|-------------------------|----------------------------------------|
| Pds5b   | Wapl                 | 0,02                     | 0,01                     | 0,02                     |                          |                      | 0,50             | Enhancer                | -                                      |
| Phc1    | PRC1                 |                          |                          | 0,04                     |                          |                      | 0                | Enhancer                | -                                      |
| Phf16   | HBO1                 | 0,04                     |                          |                          |                          |                      | 0                | Promoter                | -                                      |
| Phf20   |                      |                          |                          | 0,02                     |                          |                      | 0                | Enhancer                | yes                                    |
| Phf23   |                      | 0,53                     |                          | 0,09                     |                          |                      | 0                | Promoter                | yes                                    |
| Phf8    |                      | 0,23                     | 0,02                     |                          |                          |                      | 0,09             | Promoter                | -                                      |
| Phip    |                      | 0,04                     | 0,07                     | 0,13                     |                          |                      | 0,54             | Enhancer                | -                                      |
| Pin1    |                      |                          | 0,11                     | 0,11                     |                          |                      | 1,00             | Enhancer                | yes                                    |
| Pnp     |                      | 0,20                     |                          |                          |                          |                      | 0                | Promoter                | -                                      |
| Polr1c  | Pol I                | 0,3                      |                          |                          |                          |                      | 0                | Promoter                | -                                      |
| Polr2a  | Pol II               | 0,15                     | 0,13                     | 0,06                     |                          |                      | 0,87             | Promoter                | -                                      |
| Polr2b  | Pol II               | 0,43                     | 0,33                     | 0,07                     |                          |                      | 0,77             | Promoter                | -                                      |
| Polr2c  | Pol II               | 0,57                     | 0,16                     | 0,11                     |                          |                      | 0,28             | Promoter                | -                                      |
| Polr2e  | Pol II               | 0,85                     | 0,24                     | 0,08                     |                          |                      | 0,28             | Promoter                | -                                      |
| Polr2g  | Pol II               | 0,22                     |                          |                          |                          |                      | 0                | Promoter                | -                                      |
| Ppp2cb  |                      |                          |                          | 0,11                     |                          |                      | 0                | Enhancer                | -                                      |
| Prdm10  |                      | 0,03                     | 0,03                     |                          |                          |                      | 1,00             | Promoter                | -                                      |
| Prdm2   |                      |                          |                          | 0,02                     |                          |                      | 0                | Enhancer                | -                                      |
| Prrc2c  |                      |                          |                          | 0,01                     |                          |                      | 0                | Enhancer                | -                                      |
| Psmc5   | Proteasome           | 0,07                     |                          | 0,07                     |                          |                      | 0                | Promoter                | -                                      |
| Ptcd3   |                      |                          |                          | 0,12                     |                          |                      | 0                | Enhancer                | -                                      |
| Qser1   |                      | 0,03                     |                          | 0,01                     |                          |                      | 0                | Promoter                | -                                      |
| Rad21   | Cohesin              |                          | 0,03                     | 0,03                     |                          |                      | 1,00             | Enhancer                | yes                                    |
| Rars    |                      | 0,05                     |                          |                          |                          |                      | 0                | Promoter                | -                                      |
| Rbbp4   | NuRD/CAF1            | 1,51                     | 0,62                     | 1,09                     | 0,37                     | 0,12                 | 0,41             | Promoter                | -                                      |
| Rbbp5   | MLL                  | 0,14                     |                          |                          |                          |                      | 0                | Promoter                | yes                                    |
| Rbl1    |                      |                          |                          | 0,03                     |                          |                      | 0                | Enhancer                | -                                      |
| Rbpj    |                      | 0,30                     |                          | 0,20                     | 0,14                     |                      | 0                | Promoter                | -                                      |
| Rfc3    |                      | 0,05                     | 0,10                     |                          |                          |                      | 2,00             | Promoter                | -                                      |
| Rfc4    |                      | 0,20                     | 0,15                     | 0,19                     |                          |                      | 0,75             | Promoter                | -                                      |
| Rnf2    | PRC1                 | 0,35                     |                          | 0,30                     |                          |                      | 0                | Promoter                | yes                                    |
| Rsf1    | RSF                  | 0,05                     | 0,11                     | 0,12                     |                          |                      | 0,92             | Enhancer                | -                                      |
| Ruvbl2  | Trrap/Ep400          | 1,36                     | 1,91                     | 0,41                     | 0,16                     |                      | 1,40             | Promoter                | yes                                    |
| Samd1   |                      | 0,26                     |                          |                          |                          |                      | 0                | Promoter                | -                                      |
| Sap130  | Sin3                 | 0,18                     |                          |                          |                          |                      | 0                | Promoter                | -                                      |
| Sap30   | Sin3                 | 0,29                     |                          |                          |                          |                      | 0                | Promoter                | -                                      |
| Sap30l  | Sin3                 | 0,09                     |                          |                          |                          |                      | 0                | Promoter                | -                                      |
| Sbno1   |                      |                          |                          | 0,01                     |                          |                      | 0                | Enhancer                | -                                      |
| Sephs1  |                      | 0,14                     | 0,05                     |                          |                          |                      | 0,36             | Promoter                | -                                      |
| Sf1     |                      | 0,14                     |                          |                          |                          |                      | 0                | Promoter                | -                                      |
| Sf3b1   |                      |                          |                          | 0,04                     |                          |                      | 0                | Enhancer                | -                                      |
| Shprh   |                      | 0,04                     | 0,01                     | 0,03                     |                          |                      | 0,25             | Promoter                | -                                      |
| Sin3a   | Sin3                 | 1,34                     | 0,15                     | 0,30                     |                          |                      | 0,11             | Promoter                | yes                                    |
| Sin3b   | Sin3                 | 0,09                     |                          |                          |                          |                      | 0                | Promoter                | -                                      |
| Skp1a   | SCF ubiquitin ligase | 0,45                     | 0,23                     | 0,10                     |                          |                      | 0,51             | Promoter                | -                                      |
| Smarca4 | BAF                  | 0,14                     | 0,28                     | 0,22                     | 0,03                     |                      | 1,27             | Enhancer                | yes                                    |
| Smarcb1 | BAF                  |                          | 0,09                     | 0,05                     |                          |                      | 1,80             | Enhancer                | yes                                    |
| Smarcc1 | BAF                  | 0,10                     | 0,46                     | 0,31                     | 0,07                     |                      | 1,48             | Enhancer                | yes                                    |
| Smarcd1 | BAF                  |                          | 0,50                     | 0,35                     |                          |                      | 1,43             | Enhancer                | -                                      |
| Smc1a   | Cohesin              | 0,08                     | 0,12                     | 0,22                     | 0,06                     |                      | 0,55             | Enhancer                | yes                                    |
| Smc6    | Smc5/Smc6            |                          |                          | 0,03                     |                          |                      | 0                | Enhancer                | yes                                    |
| Smchd1  |                      |                          | 0,02                     | 0,03                     | 0,04                     |                      |                  | Heterochromatin         | -                                      |
| Spin1   |                      | 0,72                     | 0,13                     | 0,13                     |                          |                      | 0,18             | Promoter                | -                                      |

| Protein  | Complex <sup>a</sup> | H3K4me3<br>avrg<br>emPAI | H3K27ac<br>avrg<br>emPAI | H3K4me1<br>avrg<br>emPAI | H3K9me3<br>avrg<br>emPAI | GFP<br>avrg<br>emPAI | H3K27ac<br>ratio | Prediction <sup>b</sup> | Pluripotency<br>phenotype <sup>c</sup> |
|----------|----------------------|--------------------------|--------------------------|--------------------------|--------------------------|----------------------|------------------|-------------------------|----------------------------------------|
| Srrt     |                      | 0,04                     | 0,04                     | 0,08                     |                          |                      | 0,50             | Enhancer                | -                                      |
| Ssrp1    | FACT                 | 0,68                     | 0,93                     | 0,73                     | 0,29                     | 0,13                 | 1,27             | Enhancer                | -                                      |
| Suds3    | Sin3                 | 0,41                     |                          |                          |                          |                      | 0                | Promoter                | -                                      |
| Supt4h2  | DSIF                 | 0,34                     |                          |                          |                          |                      | 0                | Promoter                | yes                                    |
| Supt5h   | DSIF                 | 0,22                     | 0,16                     | 0,06                     |                          |                      | 0,73             | Promoter                | -                                      |
| Supt6h   |                      | 0,07                     | 0,09                     |                          |                          |                      | 1,29             | Promoter                | -                                      |
| Suv39h2  |                      |                          |                          |                          | 0,31                     |                      |                  | Heterochromatin         | yes                                    |
| Suz12    | PRC2                 | 0,31                     | 0,12                     | 0,40                     | 0,07                     |                      | 0,30             | Enhancer                | yes                                    |
| Taf1     | TFIID                | 0,03                     |                          |                          |                          |                      | 0                | Promoter                | yes                                    |
| Taf2     | TFIID                | 0,06                     | 0,02                     |                          |                          |                      | 0,33             | Promoter                | yes                                    |
| Taf3     | TFIID                | 0,02                     | 0,02                     |                          |                          |                      | 1,00             | Promoter                | yes                                    |
| Taf4a    | TFIID                | 0,11                     |                          |                          |                          |                      | 0                | Promoter                | yes                                    |
| Taf5     | TFIID                | 0,05                     |                          |                          |                          |                      | 0                | Promoter                | yes                                    |
| Taf6     | TFIID                | 0,20                     | 0,14                     |                          |                          |                      | 0,70             | Promoter                | yes                                    |
| Taf7     | TFIID                | 0,16                     | 0,11                     |                          |                          |                      | 0,69             | Promoter                | yes                                    |
| Taldo1   |                      |                          | 0,05                     | 0,11                     |                          |                      | 0,45             | Enhancer                | -                                      |
| Tbrg4    |                      |                          |                          | 0,09                     |                          |                      | 0                | Enhancer                | -                                      |
| Tcea1    | TFIIS                | 0,12                     | 0,26                     | 0,05                     |                          |                      | 2,17             | Promoter                | -                                      |
| Tcerg1   |                      | 0,02                     | 0,03                     | 0,02                     |                          |                      | 1,50             | Enhancer                | -                                      |
| Tcof1    |                      |                          |                          |                          | 0,02                     |                      |                  | Heterochromatin         | -                                      |
| Tead1    |                      |                          | 0,04                     | 0,04                     |                          |                      | 1,00             | Enhancer                | -                                      |
| Tlk2     |                      |                          |                          | 0,06                     |                          |                      | 0                | Enhancer                | -                                      |
| Trim24   |                      |                          | 0,25                     | 0,04                     |                          |                      | 6,25             | Enhancer                | -                                      |
| Trim33   |                      |                          | 0,08                     |                          |                          |                      |                  | Unclear                 | -                                      |
| Trp53    |                      |                          | 0,06                     |                          |                          |                      |                  | Unclear                 | -                                      |
| Trrap    | Trrap/Ep400          | 0,05                     | 0,05                     | 0,01                     |                          |                      | 1,00             | Promoter                | yes                                    |
| Uba1     |                      |                          | 0,03                     | 0,03                     |                          |                      | 1,00             | Enhancer                | -                                      |
| Ube2h    |                      |                          |                          | 0,24                     |                          |                      | 0                | Enhancer                | -                                      |
| Ubtf     |                      | 0,79                     | 0,44                     | 0,43                     |                          |                      | 0,56             | Promoter                | -                                      |
| Usp48    |                      | 0,15                     | 0,08                     | 0,21                     | 0,05                     |                      | 0,38             | Enhancer                | -                                      |
| Utp14b   |                      |                          |                          | 0,07                     |                          |                      | 0                | Enhancer                | -                                      |
| Vmn2r100 |                      | 0,02                     |                          | 0,06                     |                          |                      | 0                | Enhancer                | -                                      |
| Wdr18    | 5FMC                 | 0,04                     |                          | 0,12                     | 0,08                     |                      | 0                | Enhancer                | -                                      |
| Wdr5     | MLL                  | 0,60                     | 0,27                     | 0,17                     |                          |                      | 0,45             | Promoter                | yes                                    |
| Wdr55    |                      | 0,05                     |                          |                          |                          |                      | 0                | Promoter                | -                                      |
| Zfp280c  |                      | 0,05                     |                          |                          | 0,22                     |                      |                  | Heterochromatin         | -                                      |
| Zfp281   |                      | 0,04                     |                          |                          |                          |                      | 0                | Promoter                | yes                                    |
| Zfp462   |                      | 0,01                     |                          |                          | 0,02                     |                      |                  | Heterochromatin         | -                                      |
| Zic5     |                      | 0,03                     |                          |                          |                          |                      | 0                | Promoter                | -                                      |
| Zmynd8   | Integrator           |                          | 0,05                     | 0,04                     |                          |                      | 1,25             | Enhancer                | -                                      |
| Znf512   |                      | 0,13                     |                          | 0,24                     | 0,25                     |                      |                  | Heterochromatin         | -                                      |
| Zscan10  |                      | 0,04                     |                          | 0,09                     |                          |                      | 0                | Enhancer                | yes                                    |

<sup>a</sup> Subunit of indicated protein complex

<sup>b</sup> Prediction of genome localization based on our ChIP-MS criteria

<sup>c</sup> ESC pluripotency phenotype (references in supplementary material)

















| Protein | H3K4me3      |       |                           |                          |              |       |                           |                          | H3K27ac      |       |                           |                          |              |       |                           |                          | H3K4me1      |       |                           |                          |              |       |                           |                          | H3K9me3      |       |                           |                          |              |       |                           |                          | GFP    |       |                           |                          |     |      |   |   |
|---------|--------------|-------|---------------------------|--------------------------|--------------|-------|---------------------------|--------------------------|--------------|-------|---------------------------|--------------------------|--------------|-------|---------------------------|--------------------------|--------------|-------|---------------------------|--------------------------|--------------|-------|---------------------------|--------------------------|--------------|-------|---------------------------|--------------------------|--------------|-------|---------------------------|--------------------------|--------|-------|---------------------------|--------------------------|-----|------|---|---|
|         | Experiment 1 |       |                           |                          | Experiment 2 |       |                           |                          | Experiment 1 |       |                           |                          | Experiment 2 |       |                           |                          | Experiment 1 |       |                           |                          | Experiment 2 |       |                           |                          | Experiment 1 |       |                           |                          | Experiment 2 |       |                           |                          |        |       |                           |                          |     |      |   |   |
|         | Mascot       | emPAI | Unique pept. <sup>a</sup> | Pept. count <sup>b</sup> | Mascot       | emPAI | Unique pept. <sup>a</sup> | Pept. count <sup>b</sup> | Mascot       | emPAI | Unique pept. <sup>a</sup> | Pept. count <sup>b</sup> | Mascot       | emPAI | Unique pept. <sup>a</sup> | Pept. count <sup>b</sup> | Mascot       | emPAI | Unique pept. <sup>a</sup> | Pept. count <sup>b</sup> | Mascot       | emPAI | Unique pept. <sup>a</sup> | Pept. count <sup>b</sup> | Mascot       | emPAI | Unique pept. <sup>a</sup> | Pept. count <sup>b</sup> | Mascot       | emPAI | Unique pept. <sup>a</sup> | Pept. count <sup>b</sup> | Mascot | emPAI | Unique pept. <sup>a</sup> | Pept. count <sup>b</sup> |     |      |   |   |
| Samd1   | 206          | 0.3   | 4                         | 22                       | 139          | 0.22  | 3                         | 9                        |              |       |                           |                          |              |       |                           |                          |              |       |                           |                          |              |       |                           |                          |              |       |                           |                          |              |       |                           |                          |        |       |                           |                          |     |      |   |   |
| Sap130  | 215          | 0.22  | 5                         | 14                       | 183          | 0.14  | 4                         | 5                        |              |       |                           |                          |              |       |                           |                          |              |       |                           |                          |              |       |                           |                          |              |       |                           |                          |              |       |                           |                          |        |       |                           |                          |     |      |   |   |
| Sap30   | 136          | 0.57  | 3                         | 9                        |              |       |                           |                          |              |       |                           |                          |              |       |                           |                          |              |       |                           |                          |              |       |                           |                          |              |       |                           |                          |              |       |                           |                          |        |       |                           |                          |     |      |   |   |
| Sap30l  | 53           | 0.18  | 1                         | 2                        |              |       |                           |                          |              |       |                           |                          |              |       |                           |                          |              |       |                           |                          |              |       |                           |                          |              |       |                           |                          |              |       |                           |                          |        |       |                           |                          |     |      |   |   |
| Sbno1   |              |       |                           |                          |              |       |                           |                          |              |       |                           |                          |              |       |                           | 59                       | 0.02         | 2     | 3                         |                          |              |       |                           |                          |              |       |                           |                          |              |       |                           |                          |        |       |                           |                          |     |      |   |   |
| Sephs1  | 83           | 0.28  | 2                         | 3                        |              |       |                           |                          |              |       |                           | 47                       | 0.09         | 1     | 1                         |                          |              |       |                           |                          |              |       |                           |                          |              |       |                           |                          |              |       |                           |                          |        |       |                           |                          |     |      |   |   |
| Sf1     | 62           | 0.27  | 2                         | 2                        |              |       |                           |                          |              |       |                           |                          |              |       |                           |                          |              |       |                           |                          |              |       |                           |                          |              |       |                           |                          |              |       |                           |                          |        |       |                           |                          |     |      |   |   |
| Sf3b1   |              |       |                           |                          |              |       |                           |                          |              |       |                           |                          |              |       |                           | 150                      | 0.07         | 3     | 4                         |                          |              |       |                           |                          |              |       |                           |                          |              |       |                           |                          |        |       |                           |                          |     |      |   |   |
| Shprh   | 84           | 0.04  | 2                         | 2                        | 75           | 0.04  | 2                         | 2                        |              |       |                           | 46                       | 0.02         | 1     | 2                         |                          |              |       |                           | 118                      | 0.06         | 3     | 6                         |                          |              |       |                           |                          |              |       |                           |                          |        |       |                           |                          |     |      |   |   |
| Sin3a   | 1717         | 1.85  | 36                        | 143                      | 1192         | 0.82  | 22                        | 64                       | 178          | 0.13  | 4                         | 6                        | 278          | 0.16  | 5                         | 9                        | 321          | 0.21  | 8                         | 8                        | 695          | 0.38  | 12                        | 19                       |              |       |                           |                          |              |       |                           |                          |        |       |                           |                          |     |      |   |   |
| Sin3b   | 115          | 0.09  | 3                         | 4                        | 118          | 0.09  | 3                         | 4                        |              |       |                           |                          |              |       |                           |                          |              |       |                           |                          |              |       |                           |                          |              |       |                           |                          |              |       |                           |                          |        |       |                           |                          |     |      |   |   |
| Skp1a   | 110          | 0.45  | 2                         | 11                       | 71           | 0.45  | 2                         | 5                        |              |       |                           | 61                       | 0.45         | 2     | 3                         |                          |              |       |                           | 61                       | 0.2          | 1     | 2                         |                          |              |       |                           |                          |              |       |                           |                          |        |       |                           |                          |     |      |   |   |
| Smarca4 | 430          | 0.22  | 9                         | 15                       | 106          | 0.06  | 3                         | 5                        | 530          | 0.25  | 11                        | 18                       | 742          | 0.3   | 12                        | 33                       | 510          | 0.16  | 8                         | 13                       | 580          | 0.27  | 11                        | 29                       | 56           | 0.02  | 1                         | 1                        | 57           | 0.04  | 2                         | 2                        |        |       |                           |                          |     |      |   |   |
| Smarcb1 |              |       |                           |                          |              |       |                           |                          | 72           | 0.18  | 2                         | 2                        |              |       |                           |                          |              |       |                           | 63                       | 0.09         | 1     | 3                         |                          |              |       |                           |                          |              |       |                           |                          |        |       |                           |                          |     |      |   |   |
| Smarcc1 | 131          | 0.09  | 4                         | 5                        | 137          | 0.11  | 3                         | 4                        | 495          | 0.47  | 12                        | 15                       | 535          | 0.45  | 10                        | 20                       | 317          | 0.25  | 9                         | 10                       | 471          | 0.36  | 8                         | 15                       | 51           | 0.03  | 1                         | 1                        | 98           | 0.11  | 3                         | 3                        |        |       |                           |                          |     |      |   |   |
| Smarcd1 |              |       |                           |                          |              |       |                           |                          | 280          | 0.54  | 7                         | 7                        | 240          | 0.45  | 6                         | 8                        | 152          | 0.34  | 4                         | 5                        | 197          | 0.36  | 5                         | 5                        |              |       |                           |                          |              |       |                           |                          |        |       |                           |                          |     |      |   |   |
| Smc1a   | 126          | 0.11  | 4                         | 4                        | 56           | 0.05  | 2                         | 2                        | 240          | 0.19  | 7                         | 7                        | 66           | 0.05  | 2                         | 2                        | 452          | 0.3   | 11                        | 12                       | 180          | 0.13  | 4                         | 6                        | 141          | 0.11  | 4                         | 4                        |              |       |                           |                          |        |       |                           |                          |     |      |   |   |
| Smc6    |              |       |                           |                          |              |       |                           |                          |              |       |                           |                          |              |       |                           |                          | 82           | 0.05  | 2                         | 2                        |              |       |                           |                          |              |       |                           |                          |              |       |                           |                          |        |       |                           |                          |     |      |   |   |
| Smchd1  |              |       |                           |                          |              |       |                           |                          | 78           | 0.03  | 2                         | 2                        |              |       |                           |                          | 137          | 0.05  | 3                         | 5                        |              |       |                           |                          | 119          | 0.05  | 3                         | 4                        | 51           | 0.02  | 1                         | 2                        |        |       |                           |                          |     |      |   |   |
| Spin1   | 248          | 1.31  | 6                         | 45                       | 62           | 0.13  | 1                         | 17                       | 46           | 0.13  | 1                         | 4                        | 77           | 0.13  | 1                         | 8                        | 48           | 0.13  | 1                         | 4                        | 58           | 0.13  | 1                         | 9                        |              |       |                           |                          |              |       |                           |                          |        |       |                           |                          |     |      |   |   |
| Srrt    | 61           | 0.07  | 2                         | 2                        |              |       |                           |                          | 91           | 0.07  | 3                         | 3                        |              |       |                           |                          | 130          | 0.11  | 3                         | 3                        | 83           | 0.04  | 1                         | 1                        |              |       |                           |                          |              |       |                           |                          |        |       |                           |                          |     |      |   |   |
| Ssrp1   | 582          | 0.93  | 12                        | 66                       | 474          | 0.42  | 7                         | 54                       | 585          | 0.93  | 13                        | 39                       | 687          | 0.93  | 11                        | 65                       | 685          | 0.88  | 13                        | 41                       | 511          | 0.57  | 8                         | 88                       | 219          | 0.22  | 4                         | 14                       | 296          | 0.35  | 6                         | 25                       | 75     | 0.11  | 2                         | 3                        | 150 | 0.15 | 3 | 7 |
| Suds3   | 234          | 0.6   | 6                         | 8                        | 105          | 0.21  | 2                         | 2                        |              |       |                           |                          |              |       |                           |                          |              |       |                           |                          |              |       |                           |                          |              |       |                           |                          |              |       |                           |                          |        |       |                           |                          |     |      |   |   |
| Supt4h2 | 77           | 0.67  | 2                         | 4                        |              |       |                           |                          |              |       |                           |                          |              |       |                           |                          |              |       |                           |                          |              |       |                           |                          |              |       |                           |                          |              |       |                           |                          |        |       |                           |                          |     |      |   |   |
| Supt5h  | 386          | 0.31  | 10                        | 13                       | 265          | 0.13  | 4                         | 9                        | 191          | 0.16  | 5                         | 5                        | 281          | 0.16  | 5                         | 13                       | 72           | 0.06  | 2                         | 2                        | 155          | 0.06  | 2                         | 4                        |              |       |                           |                          |              |       |                           |                          |        |       |                           |                          |     |      |   |   |
| Supt6h  | 207          | 0.12  | 6                         | 7                        | 90           | 0.02  | 1                         | 1                        | 177          | 0.1   | 5                         | 5                        | 249          | 0.08  | 4                         | 4                        |              |       |                           |                          |              |       |                           |                          |              |       |                           |                          |              |       |                           |                          |        |       |                           |                          |     |      |   |   |
| Suv39h2 |              |       |                           |                          |              |       |                           |                          |              |       |                           |                          |              |       |                           |                          |              |       |                           |                          |              |       |                           |                          | 118          | 0.22  | 4                         | 7                        | 167          | 0.39  | 4                         | 7                        |        |       |                           |                          |     |      |   |   |



| Protein | H3K4me3      |       |                           |                          | H3K27ac      |       |                           |                          | H3K4me1      |       |                           |                          | H3K9me3      |       |                           |                          | GFP          |       |                           |                          |        |       |                           |                          |    |
|---------|--------------|-------|---------------------------|--------------------------|--------------|-------|---------------------------|--------------------------|--------------|-------|---------------------------|--------------------------|--------------|-------|---------------------------|--------------------------|--------------|-------|---------------------------|--------------------------|--------|-------|---------------------------|--------------------------|----|
|         | Experiment 1 |       | Experiment 2              |                          | Experiment 1 |       | Experiment 2              |                          | Experiment 1 |       | Experiment 2              |                          | Experiment 1 |       | Experiment 2              |                          | Experiment 1 |       | Experiment 2              |                          |        |       |                           |                          |    |
|         | Mascot       | emPAI | Unique pept. <sup>a</sup> | Pept. count <sup>b</sup> | Mascot       | emPAI | Unique pept. <sup>a</sup> | Pept. count <sup>b</sup> | Mascot       | emPAI | Unique pept. <sup>a</sup> | Pept. count <sup>b</sup> | Mascot       | emPAI | Unique pept. <sup>a</sup> | Pept. count <sup>b</sup> | Mascot       | emPAI | Unique pept. <sup>a</sup> | Pept. count <sup>b</sup> | Mascot | emPAI | Unique pept. <sup>a</sup> | Pept. count <sup>b</sup> |    |
| Wdr55   |              |       |                           |                          | 57           | 0.09  | 2                         | 2                        |              |       |                           |                          |              |       |                           |                          |              |       |                           |                          |        |       |                           |                          |    |
| Zfp280c |              |       |                           |                          | 116          | 0.09  | 4                         | 5                        |              |       |                           |                          |              |       |                           |                          |              |       |                           |                          |        |       |                           |                          |    |
| Zfp281  | 74           | 0.08  | 2                         | 2                        |              |       |                           |                          |              |       |                           |                          |              |       |                           |                          |              |       |                           |                          |        |       |                           |                          |    |
| Zfp462  |              |       |                           |                          |              |       |                           |                          |              |       |                           |                          |              |       |                           |                          |              |       |                           |                          |        |       |                           |                          |    |
| Zic5    | 64           | 0.06  | 1                         | 1                        |              |       |                           |                          |              |       |                           |                          |              |       |                           |                          |              |       |                           |                          |        |       |                           |                          |    |
| Zmynd8  |              |       |                           |                          |              |       |                           |                          | 57           | 0.03  | 2                         | 2                        | 101          | 0.06  | 2                         | 6                        |              |       |                           |                          | 55     | 0.07  | 1                         | 7                        |    |
| Znf512  |              |       |                           |                          | 153          | 0.25  | 4                         | 10                       |              |       |                           |                          |              |       |                           |                          |              |       |                           |                          | 160    | 0.3   | 5                         | 7                        | 91 |
| Zscan10 | 60           | 0.08  | 2                         | 2                        |              |       |                           |                          |              |       |                           |                          |              |       |                           |                          |              |       |                           |                          | 93     | 0.17  | 2                         | 2                        |    |

<sup>a</sup> Number of unique, non-redundant peptides identified for the specified protein

<sup>b</sup> Number of peptide spectra counted for the specified protein

Engelen, Brandsma, Supplementary Table 2

Supplementary Table 3. CHIP-MS identified complex subunits and predictions

| Complex / subunits    | H3K4me3<br>avrg<br>emPAI | H3K27ac<br>avrg<br>emPAI | H3K4me1<br>avrg<br>emPAI | H3K9me3<br>avrg<br>emPAI | GFP<br>avrg<br>emPAI | H3K27ac<br>ratio | Prediction <sup>a</sup> |
|-----------------------|--------------------------|--------------------------|--------------------------|--------------------------|----------------------|------------------|-------------------------|
| BAF complex           | 0,04                     | 0,25                     | 0,17                     | 0,01                     |                      | 1,43             | Enhancer                |
| Arid1a (Baf250a)      |                          | 0,07                     | 0,06                     |                          |                      |                  | Enhancer                |
| Dpf2 (Baf45d)         |                          | 0,22                     | 0,12                     |                          |                      |                  | Enhancer                |
| Pbrm1 (Baf180)        | 0,02                     | 0,11                     | 0,11                     |                          |                      |                  | Enhancer                |
| Smarca4 (Brg1)        | 0,14                     | 0,28                     | 0,22                     | 0,03                     |                      |                  | Enhancer                |
| Smarca1 (Baf47)       |                          | 0,09                     | 0,05                     |                          |                      |                  | Enhancer                |
| Smarcc1 (Baf155)      | 0,10                     | 0,46                     | 0,31                     | 0,07                     |                      |                  | Enhancer                |
| Smarcd1 (Baf60a)      |                          | 0,50                     | 0,35                     |                          |                      |                  | Enhancer                |
| Sin3 complex          | 0,32                     | 0,01                     | 0,03                     |                          |                      | 0,04             | Promoter                |
| Sin3a                 | 1,34                     | 0,15                     | 0,30                     |                          |                      |                  | Promoter                |
| Sin3b                 | 0,09                     |                          |                          |                          |                      |                  | Promoter                |
| Arid4a (Rbbp1)        | 0,12                     |                          |                          |                          |                      |                  | Promoter                |
| Brms1                 | 0,14                     |                          |                          |                          |                      |                  | Promoter                |
| Brms1l                | 0,47                     |                          |                          |                          |                      |                  | Promoter                |
| Fam60a                | 0,24                     |                          |                          |                          |                      |                  | Promoter                |
| Ing1                  | 0,06                     |                          |                          |                          |                      |                  | Promoter                |
| Ing2                  | 0,11                     |                          |                          |                          |                      |                  | Promoter                |
| Sap130                | 0,18                     |                          |                          |                          |                      |                  | Promoter                |
| Sap30                 | 0,29                     |                          |                          |                          |                      |                  | Promoter                |
| Sap30l                | 0,09                     |                          |                          |                          |                      |                  | Promoter                |
| Suds3                 | 0,41                     |                          |                          |                          |                      |                  | Promoter                |
| PRC1 complex          | 0,15                     |                          | 0,14                     |                          |                      | 0                | Promoter                |
| Cbx7                  | 0,10                     |                          | 0,10                     |                          |                      |                  | Promoter                |
| Phc1                  |                          |                          | 0,04                     |                          |                      |                  | Enhancer                |
| Rnf2                  | 0,35                     |                          | 0,30                     |                          |                      |                  | Promoter                |
| PRC2 complex          | 0,17                     | 0,07                     | 0,23                     | 0,04                     |                      | 0,29             | Enhancer                |
| Ezh2                  | 0,07                     | 0,04                     | 0,09                     |                          |                      |                  | Enhancer                |
| Jarid2                | 0,16                     | 0,05                     | 0,21                     | 0,04                     |                      |                  | Enhancer                |
| Mtf2                  | 0,16                     | 0,06                     | 0,22                     | 0,06                     |                      |                  | Enhancer                |
| Suz12                 | 0,31                     | 0,12                     | 0,40                     | 0,07                     |                      |                  | Enhancer                |
| TFIID complex         | 0,09                     | 0,04                     |                          |                          |                      | 0,47             | Promoter                |
| Taf1                  | 0,03                     |                          |                          |                          |                      |                  | Promoter                |
| Taf2                  | 0,06                     | 0,02                     |                          |                          |                      |                  | Promoter                |
| Taf3                  | 0,02                     | 0,02                     |                          |                          |                      |                  | Promoter                |
| Taf4a                 | 0,11                     |                          |                          |                          |                      |                  | Promoter                |
| Taf5                  | 0,05                     |                          |                          |                          |                      |                  | Promoter                |
| Taf6                  | 0,20                     | 0,14                     |                          |                          |                      |                  | Promoter                |
| Taf7                  | 0,16                     | 0,11                     |                          |                          |                      |                  | Promoter                |
| Aurora Kinase complex | 0,19                     | 0,08                     | 0,11                     | 0,69                     |                      |                  | Heterochromatin         |
| Aurkb                 | 0,22                     | 0,10                     | 0,10                     | 0,65                     |                      |                  | Heterochromatin         |
| Cdca8                 | 0,28                     | 0,13                     | 0,24                     | 1,17                     |                      |                  | Heterochromatin         |
| Incenp                | 0,06                     |                          |                          | 0,26                     |                      |                  | Heterochromatin         |

| Complex / subunits       | H3K4me3<br>avrg<br>emPAI | H3K27ac<br>avrg<br>emPAI | H3K4me1<br>avrg<br>emPAI | H3K9me3<br>avrg<br>emPAI | GFP<br>avrg<br>emPAI | H3K27ac<br>ratio | Prediction <sup>a</sup> |
|--------------------------|--------------------------|--------------------------|--------------------------|--------------------------|----------------------|------------------|-------------------------|
| Pol II complex           | 0,44                     | 0,17                     | 0,06                     |                          |                      | 0,39             | Promoter                |
| Polr2a                   | 0,15                     | 0,13                     | 0,06                     |                          |                      |                  | Promoter                |
| Polr2b                   | 0,43                     | 0,33                     | 0,07                     |                          |                      |                  | Promoter                |
| Polr2c                   | 0,57                     | 0,16                     | 0,11                     |                          |                      |                  | Promoter                |
| Polr2e                   | 0,85                     | 0,24                     | 0,08                     |                          |                      |                  | Promoter                |
| Polr2g                   | 0,22                     |                          |                          |                          |                      |                  | Promoter                |
| MLL complex              | 0,34                     | 0,04                     | 0,05                     |                          |                      | 0,13             | Promoter                |
| Mll2                     | 0,21                     |                          | 0,02                     |                          | 0,01                 |                  | Promoter                |
| Ash2l                    | 0,25                     |                          |                          |                          |                      |                  | Promoter                |
| Bap18                    | 0,63                     |                          |                          |                          |                      |                  | Promoter                |
| Dpy30                    | 0,18                     |                          |                          |                          |                      |                  | Promoter                |
| Hcfc1                    | 0,05                     |                          |                          |                          |                      |                  | Promoter                |
| Men1                     | 0,32                     | 0,03                     | 0,15                     |                          |                      |                  | Promoter                |
| Rbbp5                    | 0,14                     |                          |                          |                          |                      |                  | Promoter                |
| Wdr5                     | 0,60                     | 0,27                     | 0,17                     |                          |                      |                  | Promoter                |
| Trrap/Ep400 complex      | 0,30                     | 0,39                     | 0,09                     | 0,03                     | 0,00                 | 1,33             | Promoter                |
| Trrap                    | 0,05                     | 0,05                     | 0,01                     |                          |                      |                  | Promoter                |
| Ep400                    |                          | 0,02                     |                          |                          |                      |                  | Unclear                 |
| Dmap1                    | 0,07                     |                          | 0,04                     |                          |                      |                  | Promoter                |
| Ruvbl2                   | 1,36                     | 1,91                     | 0,41                     | 0,16                     |                      |                  | Promoter                |
| HBO1/MOZ/MORF<br>complex | 0,20                     | 0,07                     | 0,09                     | 0,01                     |                      | 0,34             | Promoter                |
| Myst2                    | 0,56                     | 0,36                     | 0,39                     | 0,06                     |                      |                  | Promoter                |
| Myst3                    | 0,08                     |                          |                          |                          |                      |                  | Promoter                |
| Myst4                    | 0,04                     |                          |                          |                          |                      |                  | Promoter                |
| Brd1                     | 0,03                     | 0,05                     | 0,10                     |                          |                      |                  | Enhancer                |
| Brpf1                    | 0,16                     |                          |                          |                          |                      |                  | Promoter                |
| Brpf3                    | 0,03                     |                          |                          |                          |                      |                  | Promoter                |
| Meaf6                    | 0,51                     | 0,19                     | 0,19                     |                          |                      |                  | Promoter                |
| Ing4                     | 0,14                     |                          | 0,07                     |                          |                      |                  | Promoter                |
| Ing5                     | 0,58                     | 0,13                     | 0,20                     |                          |                      |                  | Promoter                |
| Phf16                    | 0,04                     |                          |                          |                          |                      |                  | Promoter                |
| Cohesin complex          | 0,04                     | 0,07                     | 0,12                     | 0,03                     |                      | 0,60             | Enhancer                |
| Rad21                    |                          | 0,03                     | 0,03                     |                          |                      |                  | Enhancer                |
| Smc1a                    | 0,08                     | 0,12                     | 0,22                     | 0,06                     |                      |                  | Enhancer                |
| DSIF complex             | 0,28                     | 0,08                     | 0,03                     |                          |                      | 0,29             | Promoter                |
| Supt4h2                  | 0,34                     |                          |                          |                          |                      |                  | Promoter                |
| Supt5h                   | 0,22                     | 0,16                     | 0,06                     |                          |                      |                  | Promoter                |

<sup>a</sup> Prediction of genome localization based on our ChIP-MS criteria

Supplementary Table 4. Dppa2 target genes

| Gene symbol   | Ensembl gene ID    | Tissue/cells with highest expression | FC over Embryonic stem cells |
|---------------|--------------------|--------------------------------------|------------------------------|
| Pdgfb         | ENSMUSG00000000489 | Macrophage bone marrow 2hr LPS       | 83.7                         |
| Gnmt          | ENSMUSG00000002769 | Liver                                | 3404.7                       |
| Gstm5         | ENSMUSG00000004032 | Testis                               | 247.1                        |
| Taf7l         | ENSMUSG00000009596 | Placenta                             | 633.1                        |
| Slc47a1       | ENSMUSG00000010122 | Kidney                               | 64.5                         |
| Dazl          | ENSMUSG00000010592 | Testis                               | 27.1                         |
| Mov10l1       | ENSMUSG00000015365 | Testis                               | 26.4                         |
| Cd83          | ENSMUSG00000015396 | Macrophage peri LPS thio 1hrs        | 2432.4                       |
| Nkx2-5        | ENSMUSG00000015579 | Heart                                | 26.8                         |
| Nuak1         | ENSMUSG00000020032 | MEF                                  | 46.2                         |
| Sycp3         | ENSMUSG00000020059 | Testis                               | 19.2                         |
| Fgf22         | ENSMUSG00000020327 | Epidermis                            | 1.8                          |
| Nipal4        | ENSMUSG00000020411 | Epidermis                            | 56.4                         |
| Myocd         | ENSMUSG00000020542 | Umbilical cord                       | 121.9                        |
| Cmpk2         | ENSMUSG00000020638 | Macrophage peri LPS thio 7hrs        | 2480.9                       |
| Rasgrf2       | ENSMUSG00000021708 | Hypothalamus                         | 160.9                        |
| Ddx4          | ENSMUSG00000021758 | Testis                               | 13.1                         |
| Galnt14       | ENSMUSG00000024064 | Kidney                               | 11.1                         |
| Lipo1         | ENSMUSG00000024766 | Lacrimal gland                       | 33.4                         |
| Rin1          | ENSMUSG00000024883 | Nucleus accumbens                    | 19.1                         |
| Tdrd1         | ENSMUSG00000025081 | Testis                               | 82.6                         |
| Syce1         | ENSMUSG00000025480 | Testis                               | 24.4                         |
| 150015O10Rik  | ENSMUSG00000026051 | Osteoblast day21                     | 2756                         |
| Tnfrsf11a     | ENSMUSG00000026321 | RAW 264 7                            | 79.7                         |
| Cybrd1        | ENSMUSG00000027015 | Stomach                              | 58.2                         |
| Bfsp1         | ENSMUSG00000027420 | Lens                                 | 5785.3                       |
| Adad1         | ENSMUSG00000027719 | Testis                               | 1618.9                       |
| Sycp1         | ENSMUSG00000027855 | Testis                               | 108.1                        |
| Hormad1       | ENSMUSG00000028109 | Not Available                        | Not available                |
| Spaca1        | ENSMUSG00000028264 | Testis                               | 1382.4                       |
| Slc10a4       | ENSMUSG00000029219 | Not Available                        | Not available                |
| Figla         | ENSMUSG00000030001 | Lens                                 | 1.7                          |
| Mesp2         | ENSMUSG00000030543 | Testis                               | 3.3                          |
| Chst15        | ENSMUSG00000030930 | Mast cells IgE                       | 73.9                         |
| Cryab         | ENSMUSG00000032060 | Lens                                 | 157.1                        |
| Itga11        | ENSMUSG00000032243 | Not Available                        | Not available                |
| Kank1         | ENSMUSG00000032702 | Epidermis                            | 61.2                         |
| Ptpm          | ENSMUSG00000033278 | Lung                                 | 118.1                        |
| Cdcp1         | ENSMUSG00000035498 | Cornea                               | 36.9                         |
| C530008M17Rik | ENSMUSG00000036377 | Testis                               | 50.3                         |
| Kcna6         | ENSMUSG00000038077 | Cerebral cortex prefrontal           | 26.2                         |
| Spon1         | ENSMUSG00000038156 | Lens                                 | 391.8                        |
| Mpp6          | ENSMUSG00000038388 | Mast cells IgE                       | 3.6                          |
| Tspyl5        | ENSMUSG00000038984 | Nucleus accumbens                    | 98                           |

| Gene symbol   | Ensembl gene ID    | Tissue/cells with highest expression      | FC over Embryonic stem cells |
|---------------|--------------------|-------------------------------------------|------------------------------|
| D1Pas1        | ENSMUSG00000039224 | Testis                                    | 6.5                          |
| Dusp26        | ENSMUSG00000039661 | Dorsal root ganglia                       | 95.3                         |
| Fkbp6         | ENSMUSG00000040013 | Testis                                    | 12.6                         |
| Sec1          | ENSMUSG00000040364 | Testis                                    | 21.3                         |
| Mael          | ENSMUSG00000040629 | Testis                                    | 89.3                         |
| Rsph6a        | ENSMUSG00000040866 | Testis                                    | 262.4                        |
| Prima1        | ENSMUSG00000041669 | Neuro2a                                   | 9.9                          |
| Uggt2         | ENSMUSG00000042104 | Testis                                    | 9.2                          |
| Abcb4         | ENSMUSG00000042476 | Liver                                     | 190.9                        |
| Disc1         | ENSMUSG00000043051 | Not Available                             | Not available                |
| Npy5r         | ENSMUSG00000044014 | Nucleus accumbens                         | 11                           |
| Pcsk9         | ENSMUSG00000044254 | mIMCD.3                                   | 20.9                         |
| Mettl24       | ENSMUSG00000045555 | Lung                                      | 11.5                         |
| Olig3         | ENSMUSG00000045591 | Thymocyte DP CD4.CD8.                     | 2                            |
| She           | ENSMUSG00000046280 | Lung                                      | 19.1                         |
| Gm11554       | ENSMUSG00000048294 | Embryonic stem cells Bruce4+ V26, average | 1                            |
| Zfp697        | ENSMUSG00000050064 | Kidney                                    | 40.5                         |
| Tacstd2       | ENSMUSG00000051397 | Epidermis                                 | 640.2                        |
| Kcnf1         | ENSMUSG00000051726 | Olfactory bulb                            | 263.7                        |
| Fes           | ENSMUSG00000053158 | Mast cells                                | 99.2                         |
| Sh2d4a        | ENSMUSG00000053886 | Stomach                                   | 106.8                        |
| Kbtbd13       | ENSMUSG00000054978 | Skeletal muscle                           | 29.6                         |
| H2-Q5         | ENSMUSG00000055413 | T.cells CD8.                              | 783.5                        |
| Gulp1         | ENSMUSG00000056870 | Retinal pigment epithelium                | 87.5                         |
| Unc13d        | ENSMUSG00000057948 | Mast cells                                | 73.8                         |
| Kl            | ENSMUSG00000058488 | Kidney                                    | 1051.7                       |
| Kcng2         | ENSMUSG00000059852 | Heart                                     | 80.1                         |
| Nkpd1         | ENSMUSG00000060621 | Stomach                                   | 8.2                          |
| Rnf217        | ENSMUSG00000063760 | C2C12                                     | 25.6                         |
| Zar1          | ENSMUSG00000063935 | Ovary                                     | 4.1                          |
| Dmrtc1c2      | ENSMUSG00000067561 | Not Available                             | Not available                |
| 4930444P10Rik | ENSMUSG00000067795 | Testis                                    | 249.5                        |
| Slc25a31      | ENSMUSG00000069041 | Testis                                    | 27.1                         |
| Atxn1l        | ENSMUSG00000069895 | Ciliary bodies                            | 3.9                          |
| Hsf5          | ENSMUSG00000070345 | Testis                                    | 303.5                        |
| Zfp783        | ENSMUSG00000072653 | Retinal pigment epithelium                | 22.4                         |
| Klhl40        | ENSMUSG00000074001 | Skeletal muscle                           | 253                          |
| Tspyl3        | ENSMUSG00000074671 | T.cells CD8.                              | 38.2                         |
| Chst14        | ENSMUSG00000074916 | X3T3.L1                                   | 9.7                          |
| Vgll3         | ENSMUSG00000091243 | Osteoblast day5                           | 16.7                         |

Engelen, Brandsma, Supplementary Table 4



Supplementary Table 5. Accession numbers of used ChIP-seq data sets

| <b>Histone modifications</b> | <b>GEO dataset accession number</b> |
|------------------------------|-------------------------------------|
| H3K27ac                      | GSE24165                            |
| H3K4me1                      | GSE24165                            |
| H3K4me3                      | GSE24165                            |
| H3K9me3                      | GSE12241                            |
| Input                        | GSE24165                            |

| <b>Protein</b> | <b>GEO dataset accession number</b> |
|----------------|-------------------------------------|
| Atrx           | GSE22162                            |
| Brd4           | GSE36561                            |
| Cbx7           | GSE42466                            |
| Ctcf           | GSE49847                            |
| Ctr9           | GSE20530                            |
| Esrrb          | GSE11431                            |
| Ezh2           | GSE49178                            |
| GFP            | GSE11431                            |
| Hdac1          | GSE27844                            |
| Hdac2          | GSE27844                            |
| Jarid2         | GSE19708                            |
| Kdm1a          | GSE27844                            |
| Kdm2a          | GSE21202                            |
| Kdm5b          | GSE31968                            |
| Mtf2           | GSE16526                            |
| Mycn           | GSE11431                            |
| Nanog          | GSE44286                            |
| Oct4           | GSE44286                            |
| P300           | GSE49847                            |
| Polr2a         | GSE49847                            |
| Rad21          | GSE33346                            |
| Rbbp5          | GSE22934                            |
| Rnf2           | GSE26680                            |
| Smarca4        | GSE14344                            |
| Smc1a          | GSE22557                            |
| Supt5h         | GSE20485                            |
| Suz12          | GSE48122                            |
| Taf1           | GSE31270                            |
| Taf3           | GSE30959                            |
| Wdr5           | GSE22934                            |

| <b>Protein</b> | <b>Bioproject accession number</b> |
|----------------|------------------------------------|
| Tcea1          | PRJEB2674                          |

## References for pluripotency phenotype of factors identified by ChIP-MS

Arid1a<sup>1</sup>, Ash2l<sup>2</sup>, Aurkb<sup>3</sup>, Banf1<sup>4</sup>, Bptf1<sup>5</sup>, Cbx7<sup>6</sup>, Cdc73<sup>7</sup>, Cdk9<sup>8</sup>, Chaf1b<sup>9</sup>, Chd1<sup>10</sup>, Ctbp2<sup>11</sup>, Ctr9<sup>8,12</sup>, Dmap1<sup>13</sup>, Dppa2<sup>14</sup>, Dppa4<sup>14</sup>, Dpy30<sup>15</sup>, Ep300<sup>16</sup>, Ep400<sup>13</sup>, Esrrb<sup>17</sup>, Ezh2<sup>18</sup>, Hcfc1<sup>19</sup>, Hdac1<sup>20</sup>, Ing5<sup>8</sup>, Ino80<sup>19</sup>, Jarid2<sup>21</sup>, Kdm1a<sup>22</sup>, Kdm2b<sup>23</sup>, Kdm4c<sup>24</sup>, Kdm5b<sup>25</sup>, Klf5<sup>26</sup>, L3mbtl2<sup>27</sup>, Max<sup>28</sup>, Mtf2<sup>29</sup>, Mycn<sup>30</sup>, Myst2<sup>31</sup>, Myst3<sup>31</sup>, Nacc1<sup>32</sup>, Nfrkb<sup>19</sup>, Oct4<sup>33</sup>, Ogt<sup>34</sup>, Phf20<sup>35</sup>, Phf23<sup>12</sup>, Pin1<sup>36</sup>, Rad21<sup>37</sup>, Rbbp5<sup>15</sup>, Rnf2<sup>8,13,37</sup>, Ruvbl2<sup>13</sup>, Sin3a<sup>38</sup>, Smarca4<sup>39</sup>, Smarcb1<sup>40</sup>, Smarcc1<sup>13</sup>, Smc1a<sup>8,13</sup>, Smc6<sup>12,13</sup>, Supt4h2<sup>13</sup>, Suv39h2<sup>19</sup>, Suz12<sup>41</sup>, Taf1<sup>42</sup>, Taf2<sup>42</sup>, Taf4a<sup>42</sup>, Taf5<sup>42</sup>, Taf6<sup>42</sup>, Taf3<sup>42,43</sup>, Taf7<sup>19</sup>, Tpr<sup>13,19</sup>, Trrap<sup>13</sup>, Wdr5<sup>44</sup>, Zfp281<sup>32,45</sup>, Zscan10<sup>46</sup>.

## References

1. Gao, X. et al. ES cell pluripotency and germ-layer formation require the SWI/SNF chromatin remodeling component BAF250a. *Proc Natl Acad Sci U S A* **105**, 6656-61 (2008).
2. Wan, M. et al. The trithorax group protein Ash2l is essential for pluripotency and maintaining open chromatin in embryonic stem cells. *J Biol Chem* **288**, 5039-48 (2013).
3. Lee, D.F. et al. Regulation of embryonic and induced pluripotency by aurora kinase-p53 signaling. *Cell Stem Cell* **11**, 179-94 (2012).
4. Cox, J.L. et al. Banf1 is required to maintain the self-renewal of both mouse and human embryonic stem cells. *J Cell Sci* **124**, 2654-65 (2011).
5. Landry, J. et al. Essential role of chromatin remodeling protein Bptf in early mouse embryos and embryonic stem cells. *PLoS Genet* **4**, e1000241 (2008).
6. O'Loghlen, A. et al. MicroRNA regulation of Cbx7 mediates a switch of Polycomb orthologs during ESC differentiation. *Cell Stem Cell* **10**, 33-46 (2012).
7. Wang, P. et al. Parafibromin, a component of the human PAF complex, regulates growth factors and is required for embryonic development and survival in adult mice. *Mol Cell Biol* **28**, 2930-40 (2008).
8. Hu, G. et al. A genome-wide RNAi screen identifies a new transcriptional module required for self-renewal. *Genes Dev* **23**, 837-48 (2009).
9. Bilodeau, S., Kagey, M.H., Frampton, G.M., Rahl, P.B. & Young, R.A. SetDB1 contributes to repression of genes encoding developmental regulators and maintenance of ES cell state. *Genes Dev* **23**, 2484-9 (2009).
10. Gaspar-Maia, A. et al. Chd1 regulates open chromatin and pluripotency of embryonic stem cells. *Nature* **460**, 863-8 (2009).
11. Tarleton, H.P. & Lemischka, I.R. Delayed differentiation in embryonic stem cells and mesodermal progenitors in the absence of CtBP2. *Mech Dev* **127**, 107-19 (2010).
12. Ding, L. et al. A genome-scale RNAi screen for Oct4 modulators defines a role of the Paf1 complex for embryonic stem cell identity. *Cell Stem Cell* **4**, 403-15 (2009).
13. Fazio, T.G., Huff, J.T. & Panning, B. An RNAi screen of chromatin proteins identifies Tip60-p400 as a regulator of embryonic stem cell identity. *Cell* **134**, 162-74 (2008).
14. Maldonado-Saldivia, J. et al. Dppa2 and Dppa4 are closely linked SAP motif genes restricted to pluripotent cells and the germ line. *Stem Cells* **25**, 19-28 (2007).
15. Jiang, H. et al. Role for Dpy-30 in ES cell-fate specification by regulation of H3K4 methylation within bivalent domains. *Cell* **144**, 513-25 (2011).
16. Zhong, X. & Jin, Y. Critical roles of coactivator p300 in mouse embryonic stem cell differentiation and Nanog expression. *J Biol Chem* **284**, 9168-75 (2009).

17. Ivanova, N. et al. Dissecting self-renewal in stem cells with RNA interference. *Nature* **442**, 533-8 (2006).
18. Shen, X. et al. EZH1 mediates methylation on histone H3 lysine 27 and complements EZH2 in maintaining stem cell identity and executing pluripotency. *Mol Cell* **32**, 491-502 (2008).
19. Chia, N.Y. et al. A genome-wide RNAi screen reveals determinants of human embryonic stem cell identity. *Nature* **468**, 316-20 (2010).
20. Dovey, O.M., Foster, C.T. & Cowley, S.M. Histone deacetylase 1 (HDAC1), but not HDAC2, controls embryonic stem cell differentiation. *Proc Natl Acad Sci U S A* **107**, 8242-7 (2010).
21. Shen, X. et al. Jumonji modulates polycomb activity and self-renewal versus differentiation of stem cells. *Cell* **139**, 1303-14 (2009).
22. Whyte, W.A. et al. Enhancer decommissioning by LSD1 during embryonic stem cell differentiation. *Nature* **482**, 221-5 (2012).
23. He, J. et al. Kdm2b maintains murine embryonic stem cell status by recruiting PRC1 complex to CpG islands of developmental genes. *Nat Cell Biol* **15**, 373-84 (2013).
24. Loh, Y.H., Zhang, W., Chen, X., George, J. & Ng, H.H. Jmjd1a and Jmjd2c histone H3 Lys 9 demethylases regulate self-renewal in embryonic stem cells. *Genes Dev* **21**, 2545-57 (2007).
25. Xie, L. et al. KDM5B regulates embryonic stem cell self-renewal and represses cryptic intragenic transcription. *EMBO J* **30**, 1473-84 (2011).
26. Ema, M. et al. Kruppel-like factor 5 is essential for blastocyst development and the normal self-renewal of mouse ESCs. *Cell Stem Cell* **3**, 555-67 (2008).
27. Qin, J. et al. The polycomb group protein L3mbtl2 assembles an atypical PRC1-family complex that is essential in pluripotent stem cells and early development. *Cell Stem Cell* **11**, 319-32 (2012).
28. Hishida, T. et al. Indefinite self-renewal of ESCs through Myc/Max transcriptional complex-independent mechanisms. *Cell Stem Cell* **9**, 37-49 (2011).
29. Walker, E. et al. Polycomb-like 2 associates with PRC2 and regulates transcriptional networks during mouse embryonic stem cell self-renewal and differentiation. *Cell Stem Cell* **6**, 153-66 (2010).
30. Chappell, J., Sun, Y., Singh, A. & Dalton, S. MYC/MAX control ERK signaling and pluripotency by regulation of dual-specificity phosphatases 2 and 7. *Genes Dev* **27**, 725-33 (2013).
31. Kagey, M.H. et al. Mediator and cohesin connect gene expression and chromatin architecture. *Nature* **467**, 430-5 (2010).
32. Wang, J. et al. A protein interaction network for pluripotency of embryonic stem cells. *Nature* **444**, 364-8 (2006).
33. Niwa, H., Miyazaki, J. & Smith, A.G. Quantitative expression of Oct-3/4 defines differentiation, dedifferentiation or self-renewal of ES cells. *Nat Genet* **24**, 372-6 (2000).
34. Shafi, R. et al. The O-GlcNAc transferase gene resides on the X chromosome and is essential for embryonic stem cell viability and mouse ontogeny. *Proc Natl Acad Sci U S A* **97**, 5735-9 (2000).
35. Zhao, W. et al. Jmjd3 inhibits reprogramming by upregulating expression of INK4a/Arf and targeting PHF20 for ubiquitination. *Cell* **152**, 1037-50 (2013).
36. Nishi, M. et al. A distinct role for Pin1 in the induction and maintenance of pluripotency. *J Biol Chem* **286**, 11593-603 (2011).
37. Nitzsche, A. et al. RAD21 cooperates with pluripotency transcription factors in the maintenance of embryonic stem cell identity. *PLoS One* **6**, e19470 (2011).
38. McDonel, P., Demmers, J., Tan, D.W., Watt, F. & Hendrich, B.D. Sin3a is essential for the genome integrity and viability of pluripotent cells. *Dev Biol* **363**, 62-73 (2012).
39. Kidder, B.L., Palmer, S. & Knott, J.G. SWI/SNF-Brg1 regulates self-renewal and occupies core pluripotency-related genes in embryonic stem cells. *Stem Cells* **27**, 317-28 (2009).

40. You, J.S. et al. SNF5 is an essential executor of epigenetic regulation during differentiation. *PLoS Genet* **9**, e1003459 (2013).
41. Pasini, D., Bracken, A.P., Hansen, J.B., Capillo, M. & Helin, K. The polycomb group protein Suz12 is required for embryonic stem cell differentiation. *Mol Cell Biol* **27**, 3769-79 (2007).
42. Pijnappel, W.W. et al. A central role for TFIIID in the pluripotent transcription circuitry. *Nature* **495**, 516-9 (2013).
43. Liu, Z., Scannell, D.R., Eisen, M.B. & Tjian, R. Control of embryonic stem cell lineage commitment by core promoter factor, TAF3. *Cell* **146**, 720-31 (2011).
44. Ang, Y.S. et al. Wdr5 mediates self-renewal and reprogramming via the embryonic stem cell core transcriptional network. *Cell* **145**, 183-97 (2011).
45. Fidalgo, M. et al. Zfp281 functions as a transcriptional repressor for pluripotency of mouse embryonic stem cells. *Stem Cells* **29**, 1705-16 (2011).
46. Yu, H.B., Kunarso, G., Hong, F.H. & Stanton, L.W. Zfp206, Oct4, and Sox2 are integrated components of a transcriptional regulatory network in embryonic stem cells. *J Biol Chem* **284**, 31327-35 (2009).
